# Supplementary material for: Sequencing and phasing cancer mutations in lung cancers using a long-read portable sequencer
Source: PubMed Central journal article supplement — DNA Res. 2017 Jun 27;24(6):585–96. doi: 10.1093/dnares/dsx027 (PMC5726485; doi:10.1093/dnares/dsx027), 2017-06-27
Supplement: supplementary_data_dsx027.pdf [file supplementary_data_dsx027.pdf]

**Sequencing and phasing cancer mutations in lung cancers  
using a long-read portable sequencer**

Ayako Suzuki, Mizuto Suzuki, Junko Mizushima-Sugano, Martin C. Frith, Wojciech Makalowski,  
Takashi Kohno, Sumio Sugano, Katsuya Tsuchihara and Yutaka Suzuki

**Supplementary figures S1 - S14** (p. 2 - pp. 15)

**Supplementary tables S1 - S9** (pp. 16 - pp. 25)

**Reference** (pp. 26)

## Supplementary Figures

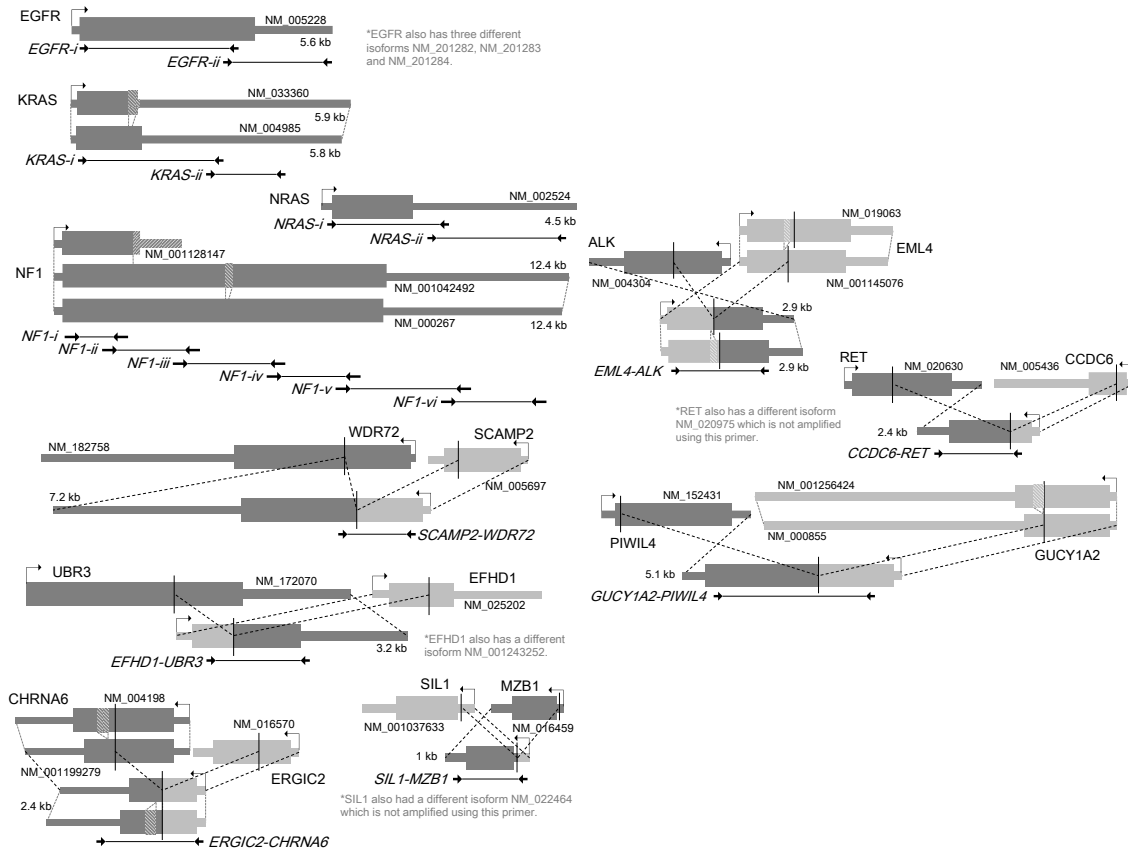

### Supplementary Figure S1. Target regions for RT-PCR and MinION sequencing.

Target regions for RT-PCR and MinION sequencing of six known cancer-related genes and five potential fusion transcripts. Images of CDSs and UTRs in each of the transcripts are shown as thick and thin bands, respectively. The small arrows indicate the PCR primers. Some gene were amplified with separate primer sets because it is difficult to amplify large fragments by PCR with easy settings. Detailed information regarding the primers is provided in **Supplementary Table S2**.



## A. Template reads

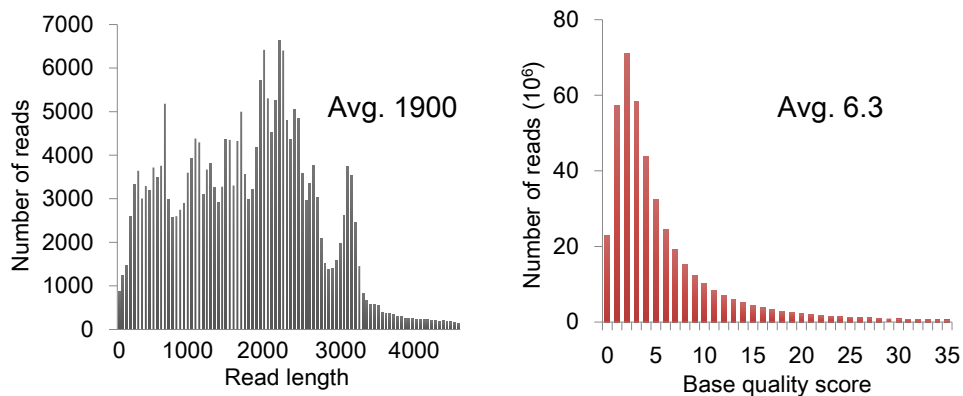

## B. Complement reads

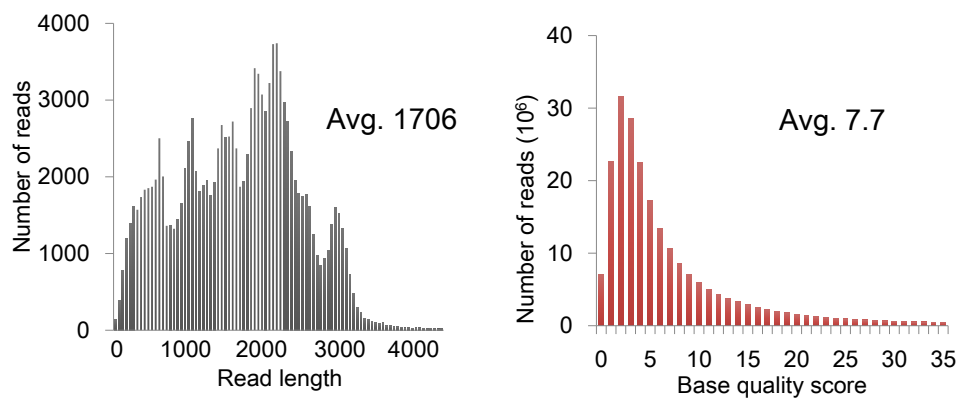

### Supplementary Figure S3. Read lengths and QVs in template and complement reads.

The distributions of the read lengths and QVs in the template (A) and complement reads (B) are shown in the left and right panel, respectively. The average number is shown in the inset.

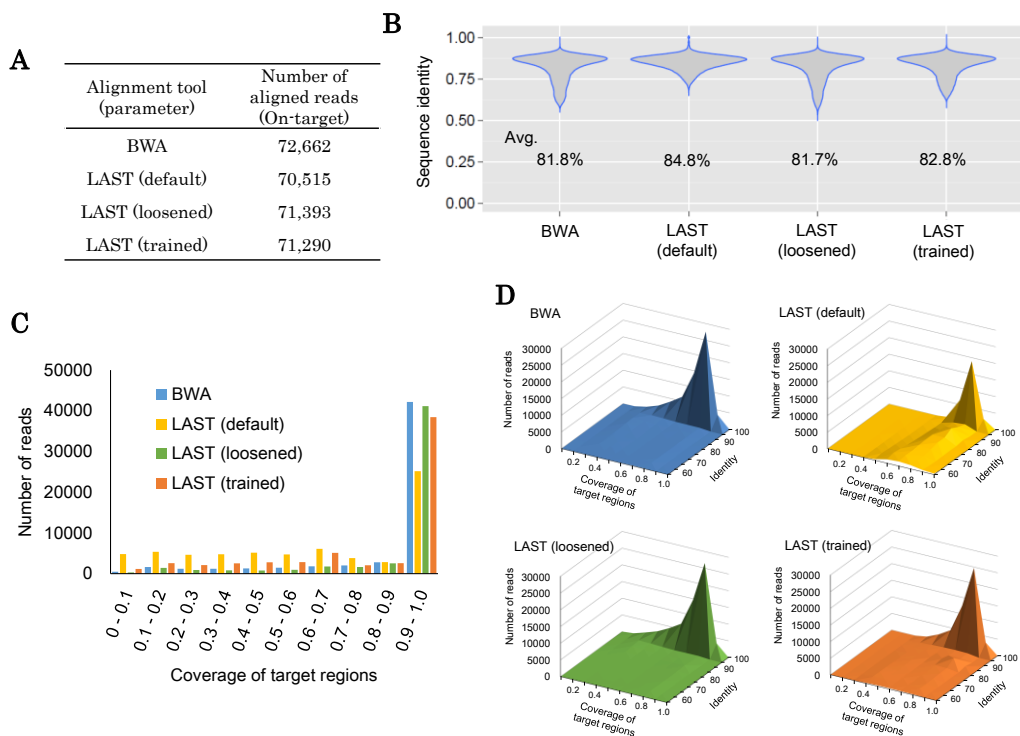

**Supplementary Figure S4. Comparisons of the sequence identities and coverage of the target regions using different alignment tools and parameters.**

Yields and sequence identities of the MinION reads depending on the alignment algorithms and parameters. The reads aligned to the target regions of four cancer-related genes were considered in this analysis. Four different tools/parameters were used in this analysis. **(A)** The number of the MinION reads aligned to the target regions. **(B)** Distributions of the sequence identities. The average numbers are shown in the inset. **(C)** Histograms of the target cover rates. **(D)** Two-dimensional histograms of the sequence identities and target cover rates.

Note that a higher coverage of the target regions is not necessarily "better" because the coverage can trivially be increased by weakening the mismatch and gap costs<sup>2</sup>. Such comparisons risk a race-to-the-bottom in alignment stringency.

Command:

BWA<sup>3</sup>: `bwa mem -x ont2d [ref] [fastq] > [out.sam]`

LAST<sup>4</sup> (default): `lastal -Q1 [ref] [fastq] > [out.maf]`

LAST (loosened): `lastal -Q1 -r1 -a1 -b1 -q1 [ref] [fastq] > [out.maf]`

LAST (trained<sup>5</sup>): `lastal -Q1 -p [output of last-train] [ref] [fastq] > [out.maf]`

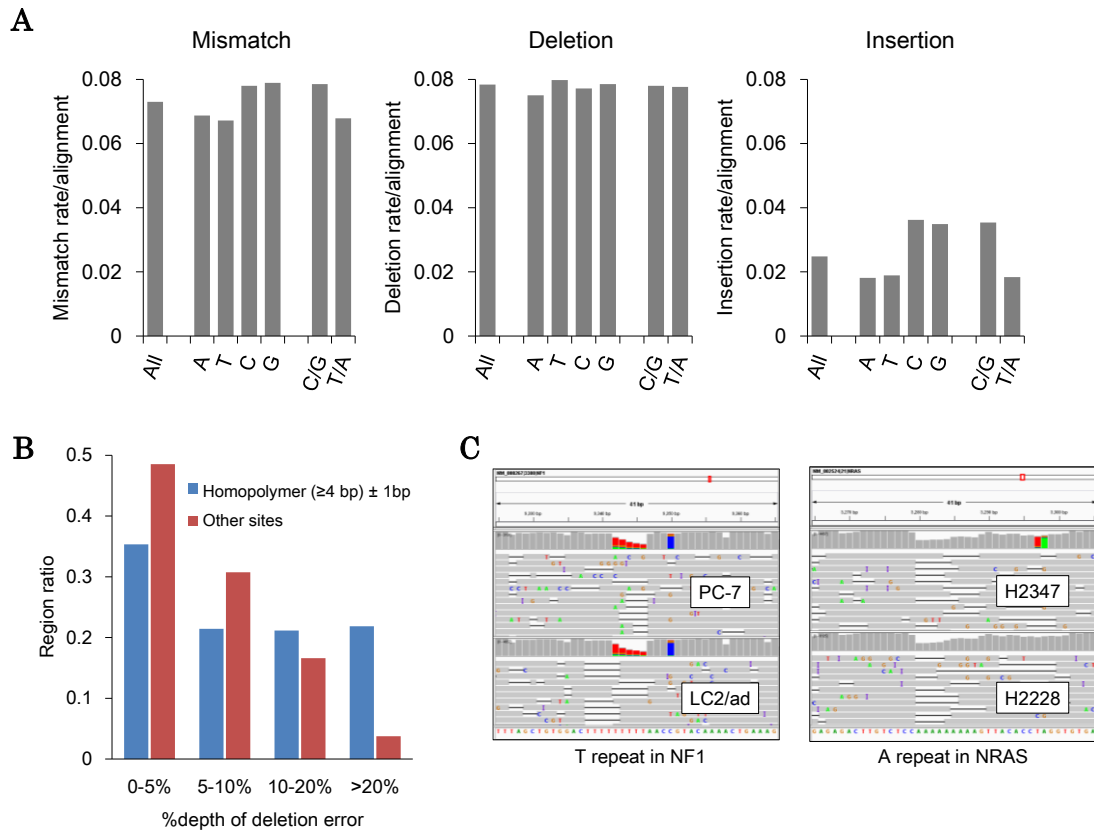

**Supplementary Figure S5. Error rates in the MinION reads.**

(A) The average error rates are shown. The error rates for mismatches, deletions and insertions are shown in the left, center and right panels, respectively. The positions of known SNPs and mutations were not included in the calculation of the error rates. (B) The depths of the deletion errors between homopolymers and other sites in the target regions. Approximately 21% of the homopolymer regions showed more than 20% tag deletion frequencies (the rightmost blue bar), whereas these highly frequent deletions were only observed in 4% of the other non-homopolymer regions (rightmost red bar). (C) Examples of deletion errors accumulated at homopolymer sites.

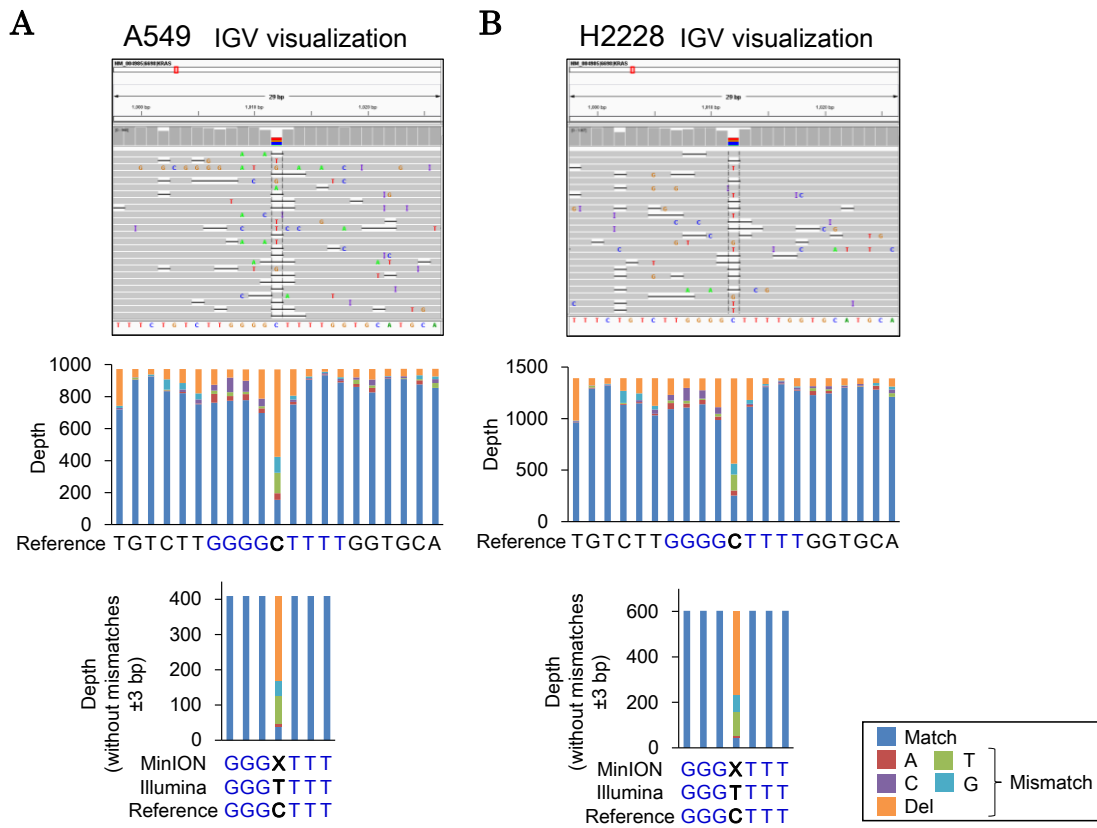

**Supplementary Figure S6. False negative SNV detection.**

The two false-negative SNVs detected are shown in this figure. A homozygous SNP in KRAS (\*264C/T, 3'UTR) in A549 cells (**A**) and H2228 cells (**B**) was not detected because of the SNP located between the 4-mer homopolymers GGGG and TTTT.

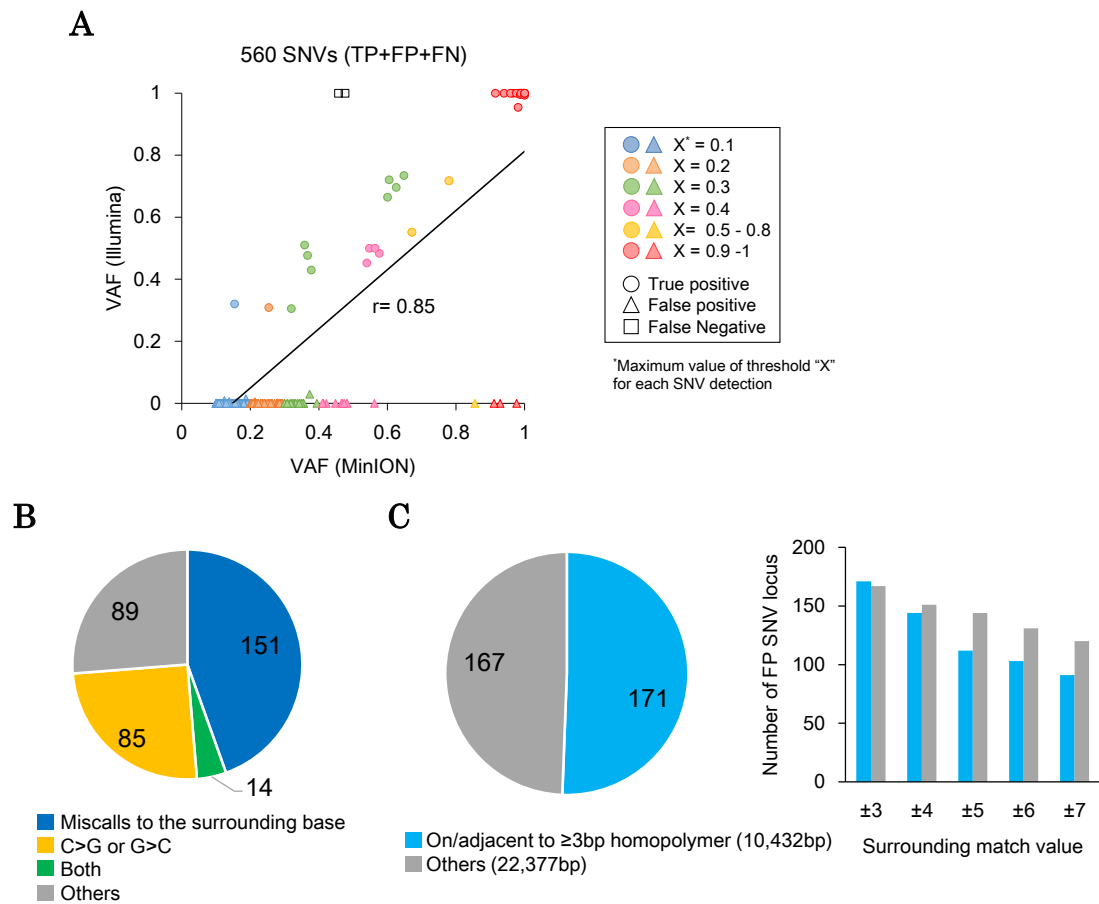

### Supplementary Figure S7. False positive SNV detection.

(A) Variant tag frequencies in the SNV detection compared between the MinION and Illumina RNA-Seq data. A similar analysis was conducted in **Fig. 2C**. False positive detection (521 SNVs) in the MinION reads, shown as triangles, are also included in the graph. The color of the triangles represents the maximum "X" (the depth threshold for MinION reads) for each false position detected. (B) Patterns of false positive SNVs. In total, 338 false positive SNV loci (521 false positive SNV detection) were observed when "X" was set to 0.1. One SNV locus was redundantly counted because different bases were called between the cell lines. (C) Number of false positives detected compared between the homopolymer and other sites (left, when the surrounding match, with one of the parameters for SNV detection, set to  $\pm 3$ ; right, when the parameter changed from  $\pm 3$  to 7).



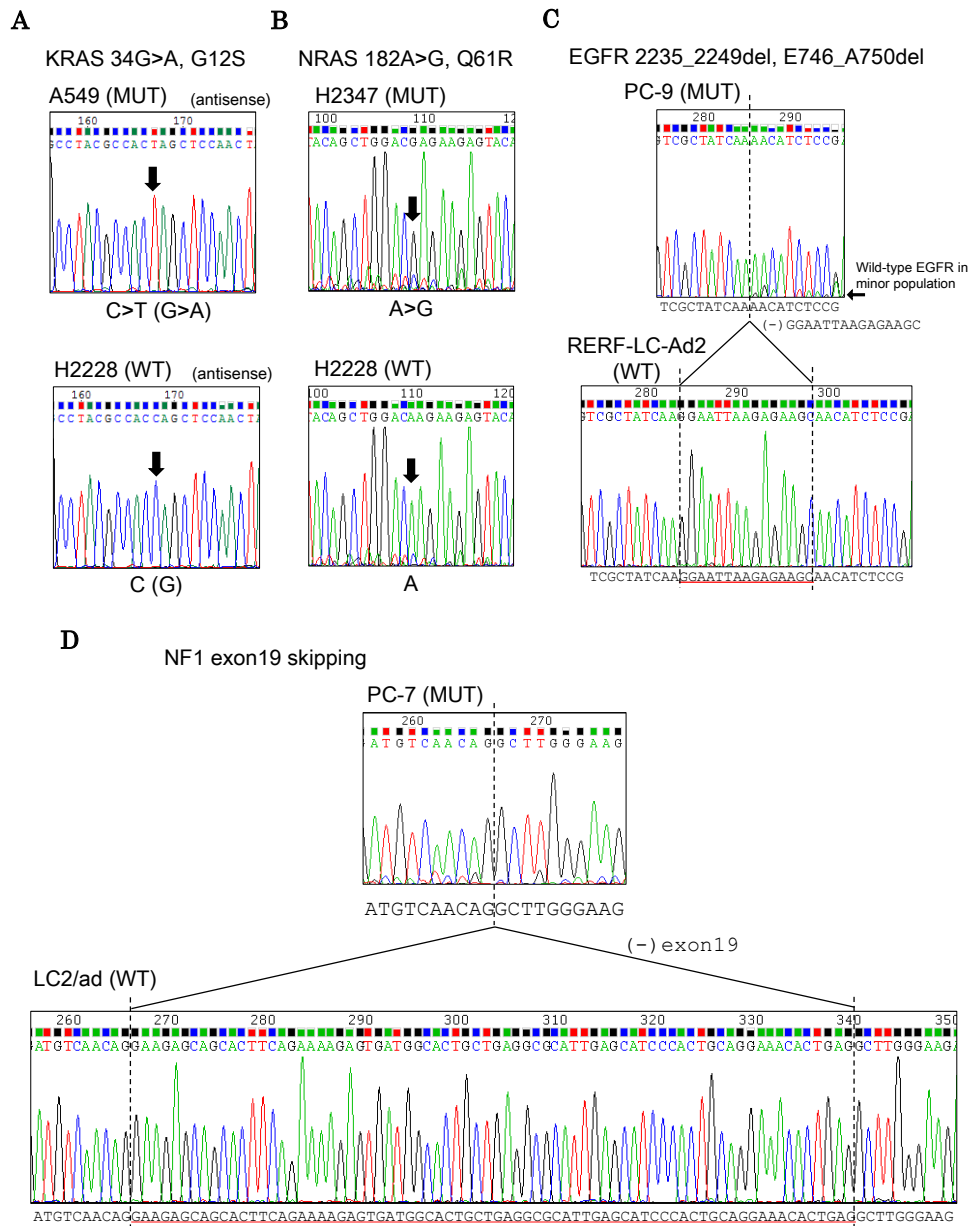

**Supplementary Figure S8. Validation of the cancer-related aberrations using Sanger sequencing.**

The direct Sanger sequencing data of the mutations are shown for the mutant and wild-type cell lines. KRAS G12S in A549 (**A**), NRAS Q61R in H2347 (**B**), EGFR E746\_A750del in PC-9 (**C**), NF1 exon 19 skipping in PC-7 (**D**), and the data in the wild-type cell lines are also represented.

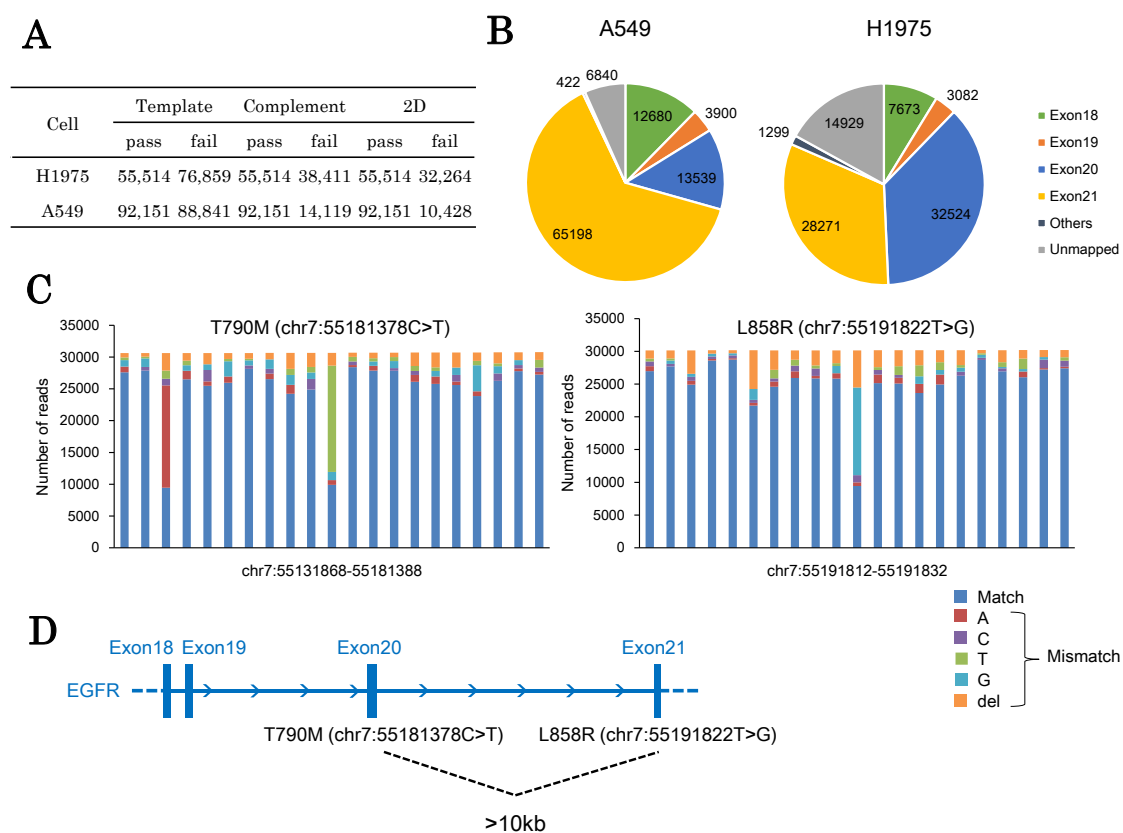

**Supplementary Figure S9. Sequencing of EGFR amplicons from genomic DNAs using MinION.**

(A) The number of reads obtained using EGFR genomic DNA amplicons of H1975 and A549 using MinION sequencing. (B) Mapping results of EGFR amplicons. (C) EGFR T790M (left) and L858R (right) mutations detected in H1975 genomic DNA templates by MinION sequencing. (D) Locus of exon 18-21 of EGFR in the human genome UCSC hg38. The distance between T790M (exon 20) and L858R (exon 21) in the genome is greater than 10 kb.

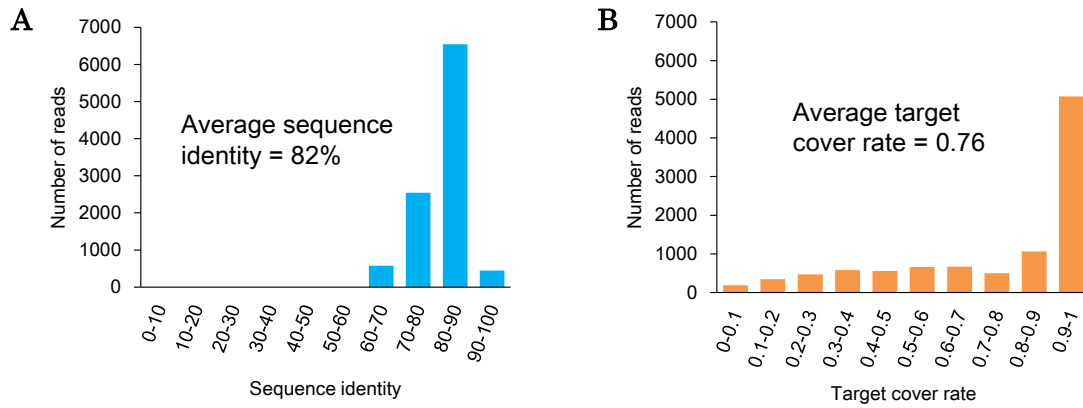

**Supplementary Figure S10. Sequence identity and coverage of MinION reads aligned to the fused RNAs.**

Sequence identity (**A**) and target cover rate (**B**) of the MinION reads aligned to the seven fused RNAs. The average numbers are shown in the inset.

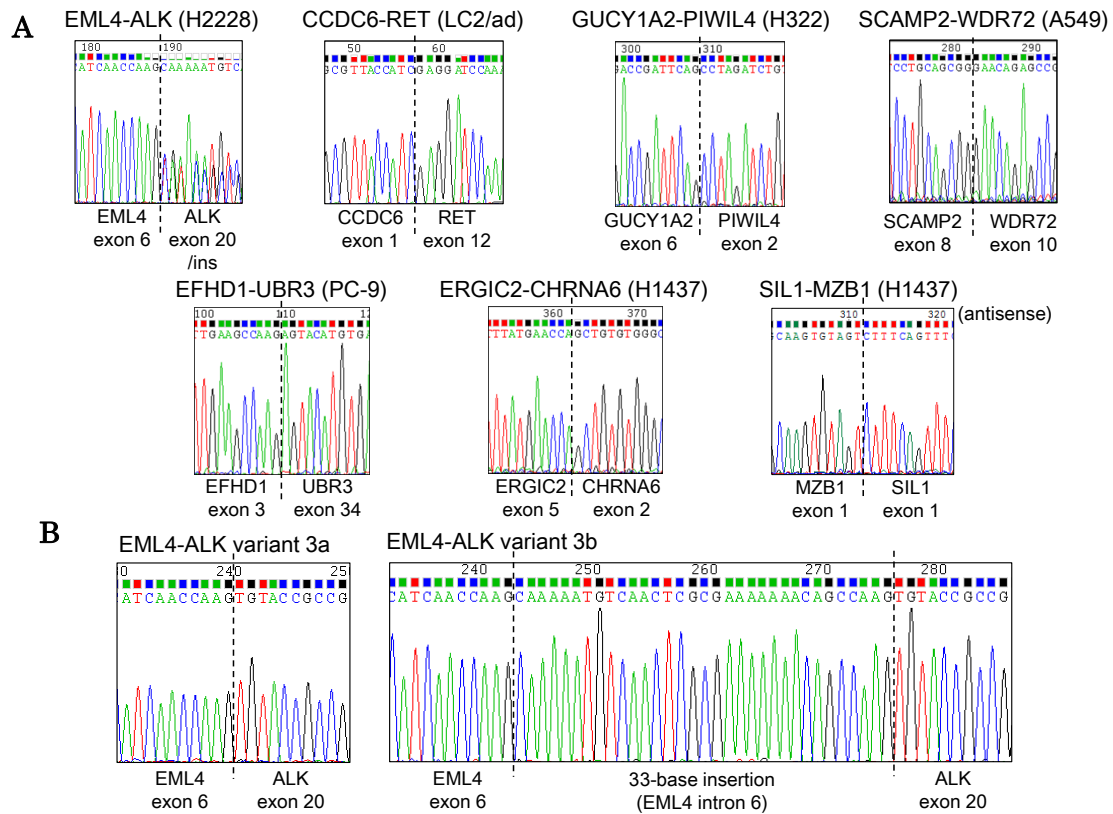

**Supplementary Figure S11. Validation of the fusion transcripts.**

(A) Validation of the junction points in the fusion transcripts. The junction points of the seven fusion transcripts were validated by direct Sanger sequencing of the PCR amplicons. (B) Two types of junction points were confirmed by TA cloning in the EML4-ALK in H2228 cells.

**A**

| Cell  | Fwd primer            | Rev primer       | Index                                 | Fwd                  | Rev                  |
|-------|-----------------------|------------------|---------------------------------------|----------------------|----------------------|
| H2228 | <i>EGFR-s_fw_ind1</i> | <i>EGRF-1-rv</i> | GGTGCTGAAGAAAGTTGTGGGTGTCTTTGTGTTAACT | CTAAGATCCCGTCCATCGCC | ACATATGGGTGGGTGAGGGA |
| PC-9  | <i>EGFR-s_fw_ind2</i> | <i>EGRF-1-rv</i> | GGTGCTGTCGATTCCGTTTGTAGTCGTCTGTTAACT  | CTAAGATCCCGTCCATCGCC | ACATATGGGTGGGTGAGGGA |
| H1975 | <i>EGFR-s_fw_ind3</i> | <i>EGRF-1-rv</i> | GGTGCTGGAGTCTTGTGTCCAGTTACCAGGTTAACT  | CTAAGATCCCGTCCATCGCC | ACATATGGGTGGGTGAGGGA |

**B**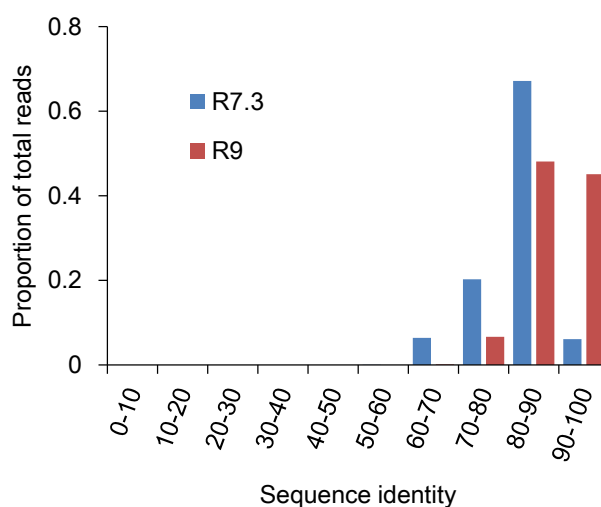

### Supplementary Figure S12. MinION sequencing of cDNA amplicons using R9 flow cell.

(A) PCR primers for cDNA amplicons for EGFR. Barcode index sequences were used for multiplex sequencing. (B) Comparison of the sequence identity between R7.3 and R9 flow cells. On average, 83% and 88% sequence identity are shown in the data from the R7.3 (pass + fail) and R9 (pass only) flow cells, respectively.

Methods: The cDNA templates were amplified using 1 cycle of 20 min at 95 °C; 30 cycles of 15 sec at 95 °C, 15 sec at 55 °C and 2 min at 72 °C; and a final 2 min cycle at 72 °C with the PCR primers described above. Using the amplified templates, the MinION library preparation was conducted according to the manufacturers' protocol for the R9 flow cells (FLO-MIN104). In total, 7077, 10162 and 6422 2D pass reads were obtained from the templates of H2228, PC-9 and H1975, respectively. All reads were aligned to the mRNA sequences using LAST (v658) with the trained parameters -a12, -A15, -b4 and -B4. Alignments with the best score in each query were extracted and used to calculate the sequence identities.

**A**

| ID      | Gender | pStage | Recurrence | Smoking history | Driver gene | RNA Integrity Number (RIN) |
|---------|--------|--------|------------|-----------------|-------------|----------------------------|
| LUAD005 | M      | 1A     | -          | -               | EGFR        | 7.7                        |
| LUAD006 | F      | 1A     | -          | -               | EGFR        | 8.0                        |
| LUAD007 | M      | 1B     | -          | +               | EGFR        | 8.6                        |
| LUAD003 | F      | 1B     | -          | +               | KRAS        | 8.6                        |
| LUAD004 | M      | 1A     | -          | +               | KRAS        | 8.1                        |
| LUAD008 | M      | 1B     | +          | +               | KRAS        | 8.0                        |
| LUAD001 | M      | 2A     | -          | +               | ALK fusion  | 8.7                        |
| LUAD002 | M      | 1A     | -          | -               | RET fusion  | 8.0                        |

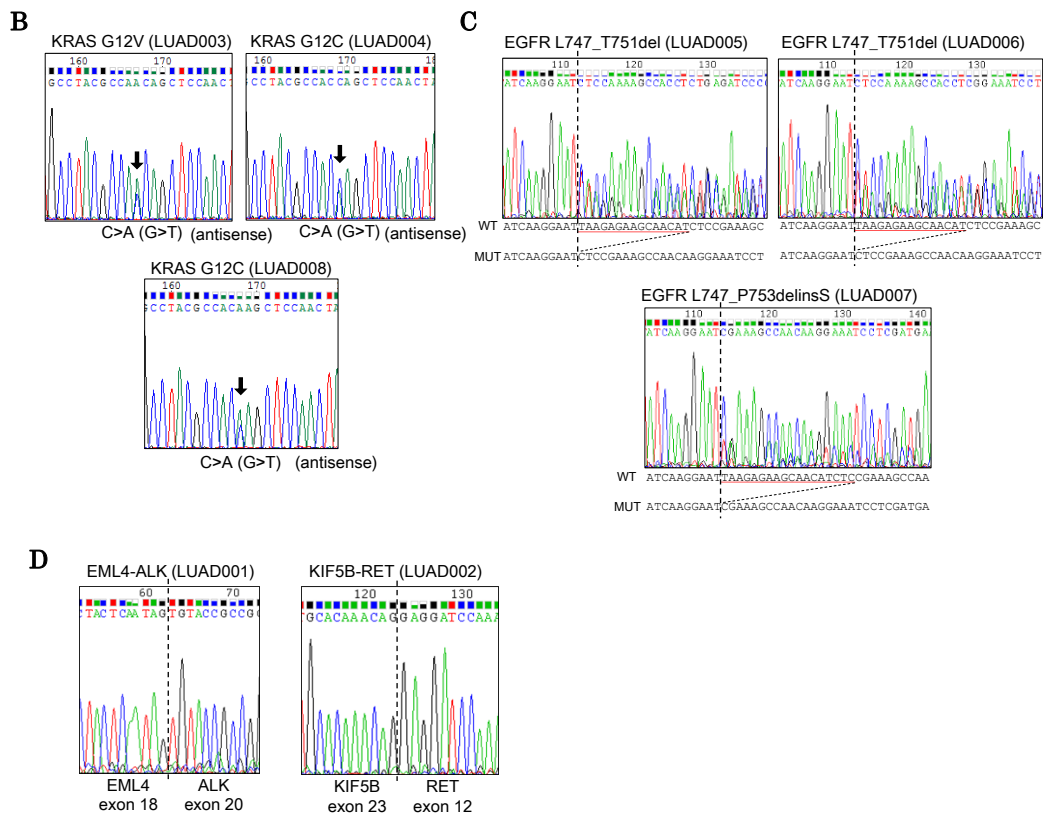

**Supplementary Figure S13. Information regarding the clinical samples and validation of their driver mutations by Sanger sequencing.**

(A) Eight RNA samples originating from eight Japanese lung adenocarcinoma patients were used in this study. RIN values were measured using a BioAnalyzer. Direct Sanger sequencing of EGFR (B) and KRAS (C) mutations are shown for the mutant and wild-type samples. (D) The junction points in EML4-ALK E18;A20 and KIF5B-RET K23;R12<sup>6</sup> were also validated by direct Sanger sequencing.

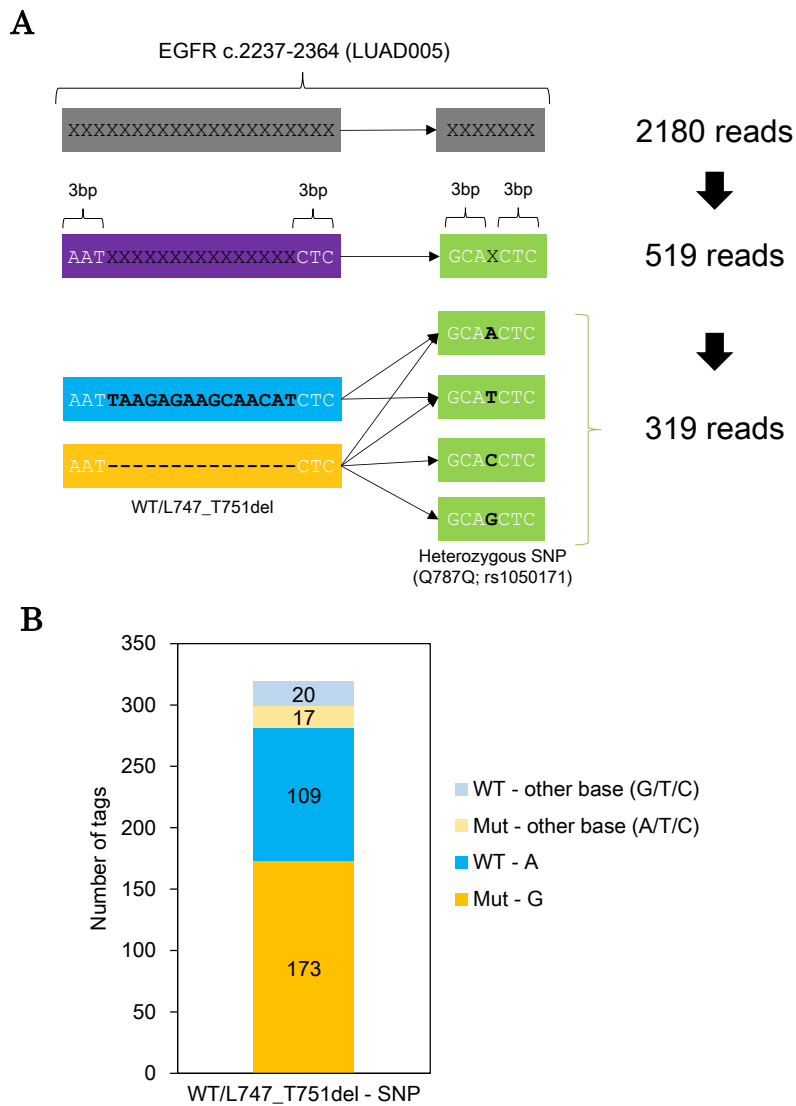

**Supplementary Figure S14. Phasing analysis of an EGFR exon 19 deletion and a SNP.**

(A) The number of reads covering both a 15 bp-deletion (c.2240-2254del, p.L747\_T751del) and a heterozygous SNP (c.2361G/A) with  $\pm 3$  bp in EGFR in the case LUAD005. In total, 319 reads were used for the phasing analysis. (B) Allelic patterns of the deletion and SNP in the 319 reads. The 15 bp-deletion was phased with 'G' in 54% of the reads, and the wild type was associated with 'A' in 34% of the reads.

## Supplementary Tables

**Supplementary Table S1. Information regarding the samples used in this study.**

| Amplicon mixture | Cell line   | Gene           | Mutation         | Primer name           |
|------------------|-------------|----------------|------------------|-----------------------|
| #1               | PC-9        | EGFR           | E746_A750del     | <i>EGFR-i ~ ii</i>    |
|                  | A549        | KRAS           | G12S             | <i>KRAS-i ~ ii</i>    |
|                  | H2347       | NRAS           | Q61R             | <i>NRAS-i ~ ii</i>    |
|                  | PC-7        | NF1            | Exon 19 skipping | <i>NF1-i ~ vi</i>     |
| #2               | H1975       | EGFR           | T790M, L858R     | <i>EGFR-i ~ ii</i>    |
|                  | H2228       | KRAS           | WT               | <i>KRAS-i ~ ii</i>    |
|                  | H2228       | NRAS           | WT               | <i>NRAS-i ~ ii</i>    |
|                  | LC2/ad      | NF1            | WT               | <i>NF1-i ~ vi</i>     |
| #3               | LC2/ad      | CCDC6-RET      | Fusion           | <i>CCDC6-RET</i>      |
|                  | H2228       | EML4-ALK       | Fusion           | <i>EML4-ALK</i>       |
|                  | H322        | GUCY1A2-PIWIL4 | Fusion           | <i>GUCY1A2-PIWIL4</i> |
|                  | A549        | SCAMP2-WDR72   | Fusion           | <i>SCAMP2-WDR72</i>   |
|                  | PC-9        | EFHD1-UBR3     | Fusion           | <i>EFHD1-UBR3</i>     |
|                  | H1437       | ERGIC2-CHRNA6  | Fusion           | <i>ERGIC2-CHRNA6</i>  |
|                  | H1437       | SIL1-MZB1      | Fusion           | <i>SIL1-MZB1</i>      |
|                  | RERF-LC-Ad2 | EGFR           | WT               | <i>EGFR-i ~ ii</i>    |



## Supplementary Table S2. PCR primers.

### A. RT-PCR of cDNA templates

| Primer name              | Gene                        | Product size         | Fwd sequence                                 | Rev sequence                                 |
|--------------------------|-----------------------------|----------------------|----------------------------------------------|----------------------------------------------|
| <i>EGFR-i</i>            | EGFR                        | 3230                 | CCCTGACTCCGTCCAGTATT                         | AGCTTTGAGCCCATTTCTA                          |
| <i>EGFR-ii</i>           | EGFR                        | 2366                 | CAGCGCTACCTTGTCATTCA                         | GCTGTAGGGGCTCTGACTGA                         |
| <i>KRAS-i</i>            | KRAS                        | 2558<br>(2682)       | AGGCCTGCTGAAAATGACTG                         | TTCTCTTGAGCCCTGAGGAA                         |
| <i>KRAS-ii</i>           | KRAS                        | 1525                 | TGTCATCTTGCTCCCTACC                          | TCTCCCTTTAAAATCTCTACA                        |
| <i>NRAS-i</i>            | NRAS                        | 2001                 | GTGGAGCTTGAGGTTCTTGC                         | TTTCCTTGAGGGCTAACTG                          |
| <i>NRAS-ii</i>           | NRAS                        | 2291                 | CACAGCAATAGGGGCTTGAT                         | AAATATCGGCCCTTCCATTT                         |
| <i>NF1-i</i>             | NF1                         | 1066                 | GGTCAAACAGTTGCTGCCAG                         | CGGTGCCATTCTGATTGCTG                         |
| <i>NF1-ii</i>            | NF1                         | 2052                 | GCTGCAATTGCTGTGTCAA                          | CCCAAGCACAGCAACATAACC                        |
| <i>NF1-iii</i>           | NF1                         | 2685<br>(2748)       | AGGCGAATGTCCCATGTGAG                         | GGTGGCAGCAGGTAGTTTCT                         |
| <i>NF1-iv</i>            | NF1                         | 1677                 | CACGGAGGTTCAAACTGGT                          | TGCTAATGCCAAACAGCAAG                         |
| <i>NF1-v</i>             | NF1                         | 3402                 | AGGTCCGCTCTCCCTTAGAG                         | GCAGGCTGACCAGTCTTTTC                         |
| <i>NF1-vi</i>            | NF1                         | 2526                 | AGCCATTTGCACAGAGCTCT                         | ACCTACAAACCTGGGAGGGT                         |
| <i>CCDC6-RET</i>         | CCDC6-RET (in-frame)        | 1401                 | GCAGCAAGAGAACAAGGTGC                         | ACCATCCTAAGTTGCTGGGC                         |
| <i>EML4-ALK</i>          | EML4-ALK (in-frame)         | 2119<br>(1944)       | CCGGCAGTCTCGATGATAGT                         | GCAACGTTAGGTGGGACAGT                         |
| <i>GUCY1A2-PIWIL4</i>    | GUCY1A2-PIWIL4 (in-frame)   | 2721                 | CTGGGACCTCAGAATTAGC                          | CAACAACCATCACGCTCTTG                         |
| <i>SCAMP2-WDR72</i>      | SCAMP2-WDR72 (in-frame)     | 1080                 | GCGGACCCAGTGGATGATAA                         | TGCCCATCTTTAAGCCAG                           |
| <i>EFHD1-UBR3</i>        | EFHD1-UBR3 (in-frame)       | 1259                 | GGTCTTCAACCCTACACGG                          | GCAATGCTGAGGTGGAGAGT                         |
| <i>ERGIC2-CHRNA6</i>     | ERGIC2-CHRNA6 (frame-shift) | 1761                 | TCGCATATTTCCGGGTACG                          | ACCACCATGGCCACGTATTT                         |
| <i>SIL1-MZB1</i>         | SIL1-MZB1 (5'UTR, in-frame) | 640                  | GAGCCCTGGTGTGTTTCATT                         | TGTGGCTGACACCTTCTCTG                         |
| <i>EGFR-iii</i>          | EGFR                        | 1313<br>896 (nested) | ACAACACCCTGGTCTGGAAG<br>CTAAGATCCCGTCCATCGCC | TGCACTCAGAGAGCTCAGGA<br>ACATATGGGTGGCTGAGGGA |
| <i>KRAS-iii</i>          | KRAS                        | 866<br>(990)         | GGAGAGAGCCCTGCTGAAAA                         | ACTGCATGCACCAAAAACCC                         |
| <i>EML4-ALK-E18:A20</i>  | EML4-ALK (in-frame)         | 1038                 | GCAGGTGGTTTGTCTCGGAT                         | TGTCTTCAGGCTGATGTTGC                         |
| <i>KIF5B-RET-K23:R12</i> | KIF5B-RET (in-frame)        | 1114                 | ACCTGCGAAACTCTTTGTT                          | AGGCCGTCGTCATAAATCAG                         |

### B. PCR of genomic DNA templates.

| Primer name    | Target exon (UCSC hg38)                    | Target region (UCSC hg38) | Product size | Fwd sequence          | Rev sequence         |
|----------------|--------------------------------------------|---------------------------|--------------|-----------------------|----------------------|
| <i>EGFR-g1</i> | Exon 18<br>(123bp; chr7:55173921-55174043) | chr7:55173522-55174302    | 781          | CTGTGCTGGAAGCCATGTTC  | CACCCCATGGCAAGGTCAAT |
| <i>EGFR-g2</i> | Exon 19<br>(99bp; chr7:55174722-55174820)  | chr7:55174366-55175042    | 677          | TGGGCTCATCTTCGTTTGTCT | TGTTTCCAGCCTTTTGGGGT |
| <i>EGFR-g3</i> | Exon 20<br>(186bp; chr7:55181293-55181478) | chr7:55180840-55181827    | 988          | GTTCTGATGTGCAGGGTCA   | GTCCTGAATGGGGGAAGCAA |
| <i>EGFR-g4</i> | Exon 21<br>(156bp; chr7:55191719-55191874) | chr7:55191401-55192313    | 913          | CAGCCTGGCAAGTCCAGTAA  | AGAAGGACTCCATTGTCTGC |

## Supplementary Table S3. PCR and sequencing primers for the Sanger sequencing validation.

### A. Primers for direct Sanger sequencing

| Sequencing target   | Sample                    | PCR primer              |                            |                      | Sequencing primer          |                      |
|---------------------|---------------------------|-------------------------|----------------------------|----------------------|----------------------------|----------------------|
|                     |                           | Name                    | Fwd sequence               | Rev sequence         | Name                       | Sequence             |
| EGFR E746_A750del   | PC-9, RERF-LC-Ad2 (WT)    | <i>EGFR-s</i>           | CTAAGATCCCGTCCATCGCC       | ACATATGGGTGGCTGAGGGA | <i>EGFR-s-fw</i>           | CTAAGATCCCGTCCATCGCC |
| EGFR T790M / L858R  | H1975                     | <i>EGFR-s</i>           | CTAAGATCCCGTCCATCGCC       | ACATATGGGTGGCTGAGGGA | <i>EGFR-s-rv</i>           | ACATATGGGTGGCTGAGGGA |
| KRAS G12S           | A549, H2228 (WT)          | <i>KRAS-s</i>           | ACTGAATATAAACTTGTGGTAGTTGG | CCCTCCCAGTCTCATGTA   | <i>KRAS-s-rv</i>           | CCCTCCCAGTCTCATGTA   |
| NRAS Q61R           | H2347, H2228 (WT)         | <i>NRAS-s</i>           | GTTGGGAAAAGCGCACTGAC       | AGGTGTGTTTGTGCTGTGGA | <i>NRAS-s-fw</i>           | GTTGGGAAAAGCGCACTGAC |
| NF1 exon19 skipping | PC-7, LC2/ad (WT)         | <i>NF1-s</i>            | CGTACTCTGGAGCCTCTCT        | GCTGACAGGTGTATCTGCGT | <i>NF1-fw</i>              | CGTACTCTGGAGCCTCTCT  |
| EML4-ALK variant 3  | H2228                     | <i>EML4-ALK-s</i>       | GCCCTCTTCACAACCTCTCC       | TGCTCTGTTCCAGACACAC  | <i>EML4-ALK-s-fw</i>       | GCCCTCTTCACAACCTCTCC |
| CCDC6-RET           | LC2/ad                    | <i>CCDC6-RET-s</i>      | GGTGTGAAGATAGAGTGGA        | AGAAGGTTGAAGAGCCGCTC | <i>CCDC6-RET-s-fw</i>      | GGTGTGAAGATAGAGTGGA  |
| GUCY1A2-PIWIL4      | H322                      | <i>GUCY1A2-PIWIL4-s</i> | CTGTGTAGTAGCCACGAA         | AAAGGATGGCACCGTGAA   | <i>GUCY1A2-PIWIL4-s-fw</i> | CTGTGTAGTAGCCACGAA   |
| SCAMP2-WDR72        | A549                      | <i>SCAMP2-WDR72-s</i>   | GAGTGGACTTTGGCCTCTCC       | GCCCCATCTTTAAGCCAGA  | <i>SCAMP2-WDR72-s-fw</i>   | GCCCCATCTTTAAGCCAGA  |
| EFHD1-UBR3          | PC-9                      | <i>EFHD1-UBR3-s</i>     | COGGGAGTTCCTGCTCATT        | CGCCTAAGATCCCGGTCTTC | <i>EFHD1-UBR3-s-fw</i>     | COGGGAGTTCCTGCTCATT  |
| ERGIC2-CHRNA6       | H1437                     | <i>ERGIC2-CHRNA6-s</i>  | CGGTAGGCTGGGACCATAAC       | TGGGTGATGGCCACTTCAA  | <i>ERGIC2-CHRNA6-s-fw</i>  | CGGTAGGCTGGGACCATAAC |
| SIL1-MZB1           | H1437                     | <i>SIL1-MZB1-s</i>      | CCCTGGTGTGTTTCATTGGC       | CTCGAACTCCGTAGTCCTGC | <i>SIL1-MZB1-s-rv</i>      | CTCGAACTCCGTAGTCCTGC |
| EGFR ex19del        | LUAD005, LUAD006, LUAD007 | <i>EGFR-s-c</i>         | CCAACCAAGCTCTCTTGAGG       | CTGCGGTGTTTTCACCAGTA | <i>EGFR-s-c-fw</i>         | CCAACCAAGCTCTCTTGAGG |
| KRAS G12 mutations  | LUAD003, LUAD004, LUAD008 | <i>KRAS-s-c</i>         | ACTGAATATAAACTTGTGGTAGTTGG | CCCTCCCAGTCTCATGTA   | <i>KRAS-s-c-rv</i>         | CCCTCCCAGTCTCATGTA   |
| EML4-ALK E18:A20    | LUAD001                   | <i>EML4-ALK-s-c</i>     | GCAGGTGGTTTGTCTGGAT        | TGCTTCCAGGCTGATGTTGC | <i>EML4-ALK-s-c-fw</i>     | GCAGGTGGTTTGTCTGGAT  |
| KIF5B-RET K23:R12   | LUAD002                   | <i>KIF5B-RET-s-c</i>    | ACCTGCGCAAACCTTTTGT        | AGGCCGTGCTATAAATCAG  | <i>KIF5B-RET-s-c-fw</i>    | ACCTGCGCAAACCTTTTGT  |

### B. Primers for TA cloning and Sanger sequencing

| Sequencing target          | Clinical sample | PCR primer        |                      |                      | Sequencing primer |                      |
|----------------------------|-----------------|-------------------|----------------------|----------------------|-------------------|----------------------|
|                            |                 | Name              | Fwd sequence         | Rev sequence         | Name              | Sequence             |
| EGFR T790M / L858R phasing | H1975           | <i>EGFR-s</i>     | CTAAGATCCCGTCCATCGCC | ACATATGGGTGGCTGAGGGA | <i>EGFR-s-rv</i>  | ACATATGGGTGGCTGAGGGA |
| EML4-ALK variant 3a/b      | H2228           | <i>EML4-ALK-s</i> | GCCCTCTTCACAACCTCTCC | TGCTCTGTTCCAGACACAC  | <i>M13-fw</i>     | GTAACACGCGCCAGT      |

**Supplementary Table S4. MinION sequencing statistics.**

| Amplicon mixture | Sequencing run | Number of reads |            |        | Average read length (2D) | Average QV (2D) |
|------------------|----------------|-----------------|------------|--------|--------------------------|-----------------|
|                  |                | Template        | Complement | 2D     |                          |                 |
| #1               | #1             | 69,715          | 44,599     | 38,432 | 1,762                    | 10.7            |
| #2               | #2             | 6,632           | 4,040      | 3,334  | 1,544                    | 10.9            |
|                  | #3             | 111,871         | 57,698     | 49,433 | 1,857                    | 10.8            |
| #3               | #4             | 11,692          | 5,934      | 4,716  | 1,910                    | 10.0            |
|                  | #5             | 36,620          | 17,470     | 13,145 | 2,104                    | 10.3            |
| Average          |                | 47,306          | 25,948     | 21,812 | 1,835                    | 10.5            |

**Supplementary Table S5. SNV detection concordance analysis.**

**A. All (39 SNVs; VAF > 10% in Illumina)**

| X*<br>(Threshold of VAF) | TP | FP  | FN      |                  | Precision | Recall |
|--------------------------|----|-----|---------|------------------|-----------|--------|
|                          |    |     | Miscall | Unk <sup>†</sup> |           |        |
| 0.1                      | 37 | 521 | 0       | 2                | 0.066     | 0.949  |
| 0.2                      | 36 | 103 | 1       | 2                | 0.259     | 0.923  |
| 0.3                      | 35 | 34  | 2       | 2                | 0.507     | 0.897  |
| 0.4                      | 27 | 15  | 3       | 9                | 0.643     | 0.692  |
| 0.5                      | 23 | 4   | 3       | 13               | 0.852     | 0.590  |
| 0.6                      | 23 | 4   | 3       | 13               | 0.852     | 0.590  |
| 0.7                      | 22 | 4   | 2       | 15               | 0.846     | 0.564  |
| 0.8                      | 21 | 4   | 1       | 17               | 0.840     | 0.538  |
| 0.9                      | 21 | 3   | 0       | 18               | 0.875     | 0.538  |
| 0.95                     | 19 | 1   | 0       | 20               | 0.950     | 0.487  |
| 1.0                      | 4  | 0   | 0       | 35               | 1.000     | 0.103  |

TP: true positive; FP: false positive; FN: false negative.

\*Thresholds of variant allele frequencies in the MinION reads. The SNVs with VAF  $\leq$  X in Illumina escaped from false positive detection.

<sup>†</sup>Unknown.

\*\*Please see the Method section and **Supplementary Fig. S2**.

**B. Heterozygous SNVs (32 SNVs; VAF > 50% in Illumina)**

| X<br>(Threshold of VAF) | TP | FP  | FN      |     | Precision | Recall |
|-------------------------|----|-----|---------|-----|-----------|--------|
|                         |    |     | Miscall | Unk |           |        |
| 0.1                     | 30 | 521 | 0       | 2   | 0.054     | 0.938  |
| 0.2                     | 30 | 103 | 0       | 2   | 0.226     | 0.938  |
| 0.3                     | 30 | 34  | 0       | 2   | 0.469     | 0.938  |
| 0.4                     | 25 | 15  | 0       | 7   | 0.625     | 0.781  |
| 0.5                     | 23 | 4   | 0       | 9   | 0.852     | 0.719  |
| 0.6                     | 23 | 4   | 0       | 9   | 0.852     | 0.719  |
| 0.7                     | 22 | 4   | 0       | 10  | 0.846     | 0.688  |
| 0.8                     | 21 | 4   | 0       | 11  | 0.840     | 0.656  |
| 0.9                     | 21 | 3   | 0       | 11  | 0.875     | 0.656  |
| 0.95                    | 19 | 1   | 0       | 13  | 0.950     | 0.594  |
| 1.0                     | 4  | 0   | 0       | 28  | 1.000     | 0.125  |

**C. Homozygous SNVs (23 SNVs; VAF > 75% in Illumina)**

| X<br>(Threshold of VAF) | TP | FP  | FN      |     | Precision | Recall |
|-------------------------|----|-----|---------|-----|-----------|--------|
|                         |    |     | Miscall | Unk |           |        |
| 0.1                     | 21 | 521 | 0       | 2   | 0.039     | 0.913  |
| 0.2                     | 21 | 103 | 0       | 2   | 0.169     | 0.913  |
| 0.3                     | 21 | 34  | 0       | 2   | 0.382     | 0.913  |
| 0.4                     | 21 | 15  | 0       | 2   | 0.583     | 0.913  |
| 0.5                     | 21 | 4   | 0       | 2   | 0.840     | 0.913  |
| 0.6                     | 21 | 4   | 0       | 2   | 0.840     | 0.913  |
| 0.7                     | 21 | 4   | 0       | 2   | 0.840     | 0.913  |
| 0.8                     | 21 | 4   | 0       | 2   | 0.840     | 0.913  |
| 0.9                     | 21 | 3   | 0       | 2   | 0.875     | 0.913  |
| 0.95                    | 19 | 1   | 0       | 4   | 0.950     | 0.826  |
| 1.0                     | 4  | 0   | 0       | 19  | 1.000     | 0.174  |

**Supplementary Table S6. List of true positive SNPs and mutations.**

| Cell line   | Primer         | Chromosome | Position<br>(UCSC hg19) | Base<br>(genome) |     | Base<br>(RNA) |     | Amino<br>acid<br>changes | Illumina RNA-Seq (true positive) |         |         | MinION                                             |         |         |                                |              |
|-------------|----------------|------------|-------------------------|------------------|-----|---------------|-----|--------------------------|----------------------------------|---------|---------|----------------------------------------------------|---------|---------|--------------------------------|--------------|
|             |                |            |                         | Ref              | Var | Ref           | Var |                          | Number of reads                  |         | VAF (%) | Number of reads<br>(without mismatches $\pm 3bp$ ) |         | VAF (%) | False<br>negative<br>detection | Low<br>Depth |
|             |                |            |                         |                  |     |               |     |                          | Total                            | Variant |         | Total<br>(A + T + C + G)                           | Variant |         |                                |              |
|             |                |            |                         |                  |     |               |     |                          |                                  |         |         |                                                    |         |         |                                |              |
| PC-9        | <i>EGFR-i</i>  | chr7       | 55214348                | C                | T   | C             | T   | N158N                    | 346                              | 346     | 100     | 1244                                               | 1244    | 100     |                                |              |
| PC-9        | <i>EGFR-i</i>  | chr7       | 55266417                | T                | C   | T             | C   | T903T                    | 422                              | 422     | 100     | 1321                                               | 1301    | 98      |                                |              |
| PC-9        | <i>EGFR-ii</i> | chr7       | 55273609                | A                | T   | A             | T   | (3'UTR)                  | 343                              | 64      | 19      | 80                                                 | 8       | 10      |                                | y            |
| PC-9        | <i>EGFR-ii</i> | chr7       | 55274084                | T                | C   | T             | C   | (3'UTR)                  | 550                              | 549     | 100     | 56                                                 | 55      | 98      |                                | y            |
| H1975       | <i>EGFR-i</i>  | chr7       | 55233089                | C                | T   | C             | T   | A613A                    | 298                              | 298     | 100     | 2250                                               | 2242    | 100     |                                |              |
| H1975       | <i>EGFR-i</i>  | chr7       | 55238874                | T                | A   | T             | A   | T629T                    | 335                              | 335     | 100     | 1916                                               | 1900    | 99      |                                |              |
| H1975       | <i>EGFR-i</i>  | chr7       | 55249063                | G                | A   | G             | A   | Q787Q                    | 354                              | 260     | 73      | 1911                                               | 1238    | 65      |                                |              |
| H1975       | <i>EGFR-i</i>  | chr7       | 55249071                | C                | T   | C             | T   | T790M                    | 347                              | 249     | 72      | 1934                                               | 1507    | 78      |                                |              |
| H1975       | <i>EGFR-i</i>  | chr7       | 55259515                | T                | G   | T             | G   | L858R                    | 408                              | 294     | 72      | 1790                                               | 1083    | 61      |                                |              |
| H1975       | <i>EGFR-i</i>  | chr7       | 55266417                | T                | C   | T             | C   | T903T                    | 257                              | 179     | 70      | 1904                                               | 1191    | 63      |                                |              |
| RERF-LC-Ad2 | <i>EGFR-i</i>  | chr7       | 55214348                | C                | T   | C             | T   | N158N                    | 903                              | 388     | 43      | 765                                                | 289     | 38      |                                |              |
| RERF-LC-Ad2 | <i>EGFR-i</i>  | chr7       | 55229255                | G                | A   | G             | A   | R521K                    | 994                              | 481     | 48      | 675                                                | 389     | 58      |                                |              |
| RERF-LC-Ad2 | <i>EGFR-i</i>  | chr7       | 55238874                | T                | A   | T             | A   | T629T                    | 960                              | 458     | 48      | 676                                                | 248     | 37      |                                |              |
| RERF-LC-Ad2 | <i>EGFR-i</i>  | chr7       | 55266417                | T                | C   | T             | C   | T903T                    | 765                              | 765     | 100     | 1033                                               | 1022    | 99      |                                |              |
| RERF-LC-Ad2 | <i>EGFR-i</i>  | chr7       | 55268916                | C                | T   | C             | T   | D994D                    | 1321                             | 661     | 50      | 1038                                               | 568     | 55      |                                |              |
| RERF-LC-Ad2 | <i>EGFR-ii</i> | chr7       | 55274084                | T                | C   | T             | C   | (3'UTR)                  | 1148                             | 586     | 51      | 282                                                | 159     | 56      |                                |              |
| A549        | <i>KRAS-ii</i> | chr12      | 25359841                | T                | C   | A             | G   | (3'UTR)                  | 27                               | 27      | 100     | 233                                                | 219     | 94      |                                |              |
| A549        | <i>KRAS-ii</i> | chr12      | 25360138                | T                | C   | A             | G   | (3'UTR)                  | 48                               | 48      | 100     | 758                                                | 755     | 100     |                                |              |
| A549        | <i>KRAS-i</i>  | chr12      | 25361091                | T                | C   | A             | G   | (3'UTR)                  | 16                               | 16      | 100     | 405                                                | 391     | 97      |                                |              |
| A549        | <i>KRAS-i</i>  | chr12      | 25361756                | C                | A   | G             | T   | (3'UTR)                  | 36                               | 36      | 100     | 440                                                | 435     | 99      |                                |              |
| A549        | <i>KRAS-i</i>  | chr12      | 25362217                | A                | G   | T             | C   | (3'UTR)                  | 31                               | 31      | 100     | 536                                                | 536     | 100     |                                |              |
| A549        | <i>KRAS-i</i>  | chr12      | 25362465                | G                | A   | C             | T   | (3'UTR)                  | 35                               | 35      | 100     | 168                                                | 80      | 48      | y                              |              |
| A549        | <i>KRAS-i</i>  | chr12      | 25362552                | A                | C   | T             | G   | (3'UTR)                  | 57                               | 57      | 100     | 416                                                | 415     | 100     |                                |              |
| A549        | <i>KRAS-i</i>  | chr12      | 25398285                | C                | T   | G             | A   | G12S                     | 22                               | 21      | 95      | 262                                                | 257     | 98      |                                |              |
| H2228       | <i>KRAS-ii</i> | chr12      | 25359841                | T                | C   | A             | G   | (3'UTR)                  | 75                               | 75      | 100     | 633                                                | 579     | 91      |                                |              |
| H2228       | <i>KRAS-ii</i> | chr12      | 25360138                | T                | C   | A             | G   | (3'UTR)                  | 150                              | 150     | 100     | 1483                                               | 1468    | 99      |                                |              |
| H2228       | <i>KRAS-i</i>  | chr12      | 25361091                | T                | C   | A             | G   | (3'UTR)                  | 59                               | 59      | 100     | 604                                                | 594     | 98      |                                |              |
| H2228       | <i>KRAS-i</i>  | chr12      | 25361685                | G                | A   | C             | T   | (3'UTR)                  | 179                              | 81      | 45      | 556                                                | 300     | 54      |                                |              |
| H2228       | <i>KRAS-i</i>  | chr12      | 25362217                | A                | G   | T             | C   | (3'UTR)                  | 106                              | 106     | 100     | 791                                                | 791     | 100     |                                |              |
| H2228       | <i>KRAS-i</i>  | chr12      | 25362465                | G                | A   | C             | T   | (3'UTR)                  | 141                              | 141     | 100     | 234                                                | 107     | 46      | y                              |              |
| H2228       | <i>KRAS-i</i>  | chr12      | 25362552                | A                | C   | T             | G   | (3'UTR)                  | 147                              | 146     | 99      | 552                                                | 552     | 100     |                                |              |
| H2347       | <i>NRAS-i</i>  | chr1       | 115256529               | T                | C   | A             | G   | Q61R                     | 226                              | 225     | 100     | 623                                                | 615     | 99      |                                |              |
| PC-7        | <i>NF1-ii</i>  | chr17      | 29553485                | G                | A   | G             | A   | P678P                    | 20                               | 20      | 100     | 1754                                               | 1682    | 96      |                                |              |
| PC-7        | <i>NF1-vi</i>  | chr17      | 29703374                | G                | A   | G             | A   | (3'UTR)                  | 28                               | 28      | 100     | 1556                                               | 1536    | 99      |                                |              |
| PC-7        | <i>NF1-vi</i>  | chr17      | 29703438                | C                | G   | C             | G   | (3'UTR)                  | 20                               | 20      | 100     | 1371                                               | 1338    | 98      |                                |              |
| LC2/ad      | <i>NF1-i</i>   | chr17      | 29508775                | G                | A   | G             | A   | L234L                    | 96                               | 53      | 55      | 921                                                | 618     | 67      |                                |              |
| LC2/ad      | <i>NF1-ii</i>  | chr17      | 29553485                | G                | A   | G             | A   | P678P                    | 110                              | 34      | 31      | 1187                                               | 301     | 25      |                                |              |
| LC2/ad      | <i>NF1-vi</i>  | chr17      | 29703374                | G                | A   | G             | A   | (3'UTR)                  | 144                              | 44      | 31      | 1644                                               | 525     | 32      |                                |              |
| LC2/ad      | <i>NF1-vi</i>  | chr17      | 29703438                | C                | G   | C             | G   | (3'UTR)                  | 128                              | 41      | 32      | 1978                                               | 304     | 15      |                                |              |
| LC2/ad      | <i>NF1-vi</i>  | chr17      | 29704002                | T                | C   | T             | C   | (3'UTR)                  | 170                              | 113     | 66      | 1273                                               | 764     | 60      |                                |              |

**Supplementary Table S7. Number of MinION reads aligned to fusion genes.**

| Fusion transcript | Alignment to mRNAs |                              | Alignment to fusion RNAs |                  |            |
|-------------------|--------------------|------------------------------|--------------------------|------------------|------------|
|                   | Total*             | Split alignment <sup>†</sup> | Total                    | Junction covered |            |
|                   |                    |                              |                          | ±10 bp           | ±50 bp     |
| CCDC6-RET         | 782                | 341 (44%)                    | 718                      | 464 (65%)        | 451 (63%)  |
| EML4-ALK          | 742                | 540 (73%)                    | 558                      | 544 (97%)        | 533 (96%)  |
| GUCY1A2-PIWIL4    | 6401               | 4433 (69%)                   | 6621                     | 5249 (79%)       | 5185 (78%) |
| SCAMP2-WDR72      | 316                | 244 (77%)                    | 311                      | 262 (84%)        | 256 (82%)  |
| EFHD1-UBR3        | 562                | 460 (82%)                    | 559                      | 521 (93%)        | 507 (91%)  |
| ERGIC2-CHRNA6     | 820                | 529 (65%)                    | 786                      | 538 (68%)        | 530 (67%)  |
| SIL1-MZB1         | 620                | 191 (31%)                    | 556                      | 411 (74%)        | 129 (23%)  |

\*We selected reads aligned to either of the fusion partners.

<sup>†</sup>We selected split alignments to two regions and discarded reads aligned to three or more regions.

**Supplementary Table S8. Summary of the EGFR-diluted sequencing analysis.**

| Sequencing run   | MUT : WT* | Number of 2D reads |                 |                 | Sequence identity (avg.) | % VAF <sup>‡</sup> |       |        | Expected % VAF** |
|------------------|-----------|--------------------|-----------------|-----------------|--------------------------|--------------------|-------|--------|------------------|
|                  |           | Total              | Aligned         | On-target       |                          | T790M              | L858R | Double |                  |
| #D1              | 1: 1      | 23,948             | 18,163<br>(76%) | 16,650<br>(70%) | 85%                      | 22.3%              | 17.9% | 22.5%  | 35.8%            |
| #D2              | 1: 4      | 36,038             | 30,636<br>(85%) | 29,025<br>(81%) | 83%                      | 9.9%               | 8.4%  | 8.7%   | 14.3%            |
| #D3              | 1: 9      | 22,417             | 14,445<br>(64%) | 13,804<br>(62%) | 80%                      | 4.1%               | 4.2%  | 7.6%   | 7.2%             |
| #D4              | 1: 19     | 43,328             | 35,807<br>(83%) | 34,680<br>(80%) | 82%                      | 4.9%               | 4.3%  | 4.1%   | 3.6%             |
| #D5 <sup>†</sup> | 1: 99     | 59,907             | 48,117<br>(80%) | 46,057<br>(77%) | 85%                      | 0.09%              | 0.13% | 0.06%  | 0.7%             |

\*MUT: H1975, WT: RERF-LC-Ad2.

<sup>†</sup>Three sequencing runs were merged.

<sup>‡</sup>The reads without mismatches  $\pm 3$  bp of the SNV were used in the calculation of the VAFs.

\*\*H1975 transcribed mutant alleles in 71.6% of the EGFR RNAs (calculated using the MinION sequencing result of H1975 *EGFR-i*).



**Supplementary Table S9. Summary of the fusion transcripts in the clinical samples.**

**A. Analysis of the fusion transcripts.**

| Fusion transcript | Alignment to mRNAs |                  | Alignment to fusion RNAs |                  |              |
|-------------------|--------------------|------------------|--------------------------|------------------|--------------|
|                   | Total*             | Split alignment† | Total                    | Junction covered |              |
|                   |                    |                  |                          | ±10 bp           | ±50 bp       |
| EML4-ALK E18;A20  | 2,296              | 1,219 (53%)      | 2,165                    | 1,803 (83%)      | 1,718 (79%)  |
| KIF5B-RET K23;R12 | 44,994             | 26,023 (58%)     | 44,412                   | 31,331 (71%)     | 30,524 (69%) |

\*We selected reads aligned to either of the fusion partners.

†We selected split alignments to two regions and discarded reads aligned to three or more regions.

**B. Concordance of SNV detection in the fusion transcripts.**

| X<br>(Threshold of VAF) | TP | FP | FN      |     | Precision | Recall |
|-------------------------|----|----|---------|-----|-----------|--------|
|                         |    |    | Miscall | Unk |           |        |
| 0.1                     | 2  | 4  | 0       | 0   | 0.333     | 1.000  |
| 0.2 - 0.95              | 2  | 0  | 0       | 0   | 1.000     | 1.000  |
| 1.0                     | 1  | 0  | 1       | 0   | 1.000     | 0.500  |

Note: Similarly to **Supplementary Fig. S2** and **Supplementary Table S5**, six SNV candidates were detected by the MinION sequencing of EML4-ALK and KIF5B-RET when the VAF threshold “X” set to 0.1. Two SNVs were verified as true positive SNVs using Illumina RNA-Seq or direct Sanger sequencing. One of the two SNVs was detected only in Sanger sequencing because the Illumina RNA-Seq had small depths in the position of the SNV.

## References

1. Suzuki, A., Makinoshima, H., Wakaguri, H., et al. 2014, Aberrant transcriptional regulations in cancers: genome, transcriptome and epigenome analysis of lung adenocarcinoma cell lines. *Nucleic Acids Res*, **42**, 13557-13572.
2. Frith, M. C., Park, Y., Sheetlin, S. L. and Spouge, J. L. 2008, The whole alignment and nothing but the alignment: the problem of spurious alignment flanks. *Nucleic Acids Res*, **36**, 5863-5871.
3. Li, H. and Durbin, R. 2009, Fast and accurate short read alignment with Burrows-Wheeler transform. *Bioinformatics*, **25**, 1754-1760.
4. Kielbasa, S. M., Wan, R., Sato, K., Horton, P. and Frith, M. C. 2011, Adaptive seeds tame genomic sequence comparison. *Genome Res*, **21**, 487-493.
5. Hamada, M., Ono, Y., Asai, K. and Frith, M. C. 2016, Training alignment parameters for arbitrary sequencers with LAST-TRAIN. *Bioinformatics*.
6. Kohno, T., Ichikawa, H., Totoki, Y., et al. 2012, KIF5B-RET fusions in lung adenocarcinoma. *Nat Med*, **18**, 375-377.
